# Supplementary material for: Isolation of HIV-1-Neutralizing Mucosal Monoclonal Antibodies from Human Colostrum
Source: PubMed Central journal article supplement (PMC3356285; doi:10.1371/journal.pone.0037648), 2012-05-18
Supplement: pone.0037648.s001.pdf [file pone.0037648.s001.pdf]

# Supplemental Fig 1

## A

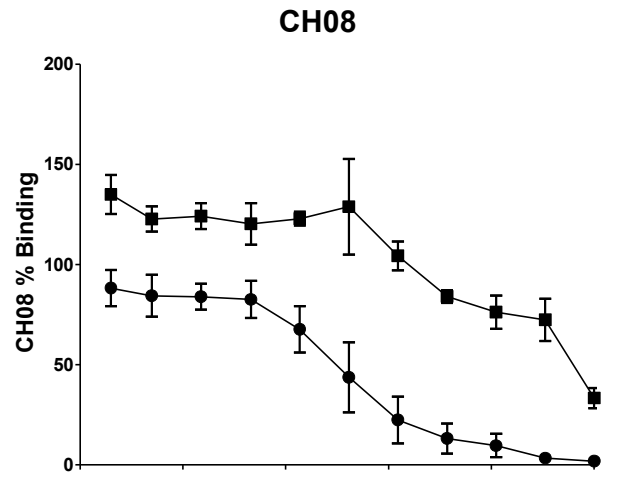

## B

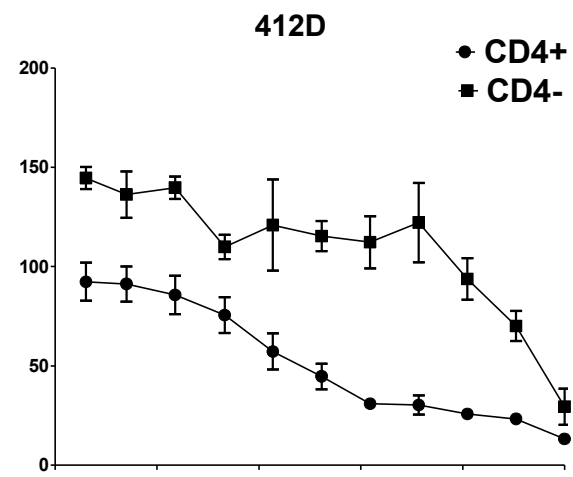

## C

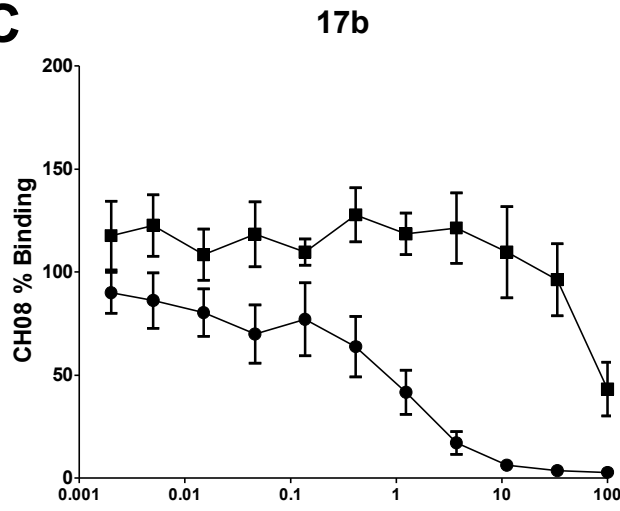

## D

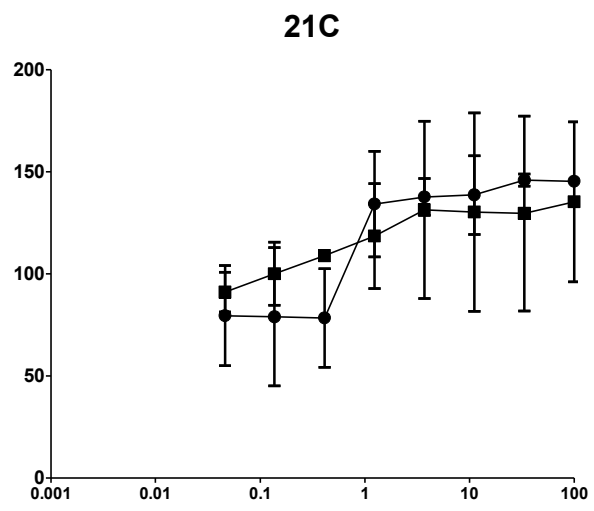

Concentration µg/mL
