# Supplementary material for: Isolation of HIV-1-Neutralizing Mucosal Monoclonal Antibodies from Human Colostrum
Source: PubMed Central journal article supplement (PMC3356285; doi:10.1371/journal.pone.0037648), 2012-05-18
Supplement: pone.0037648.s002.pdf [file pone.0037648.s002.pdf]

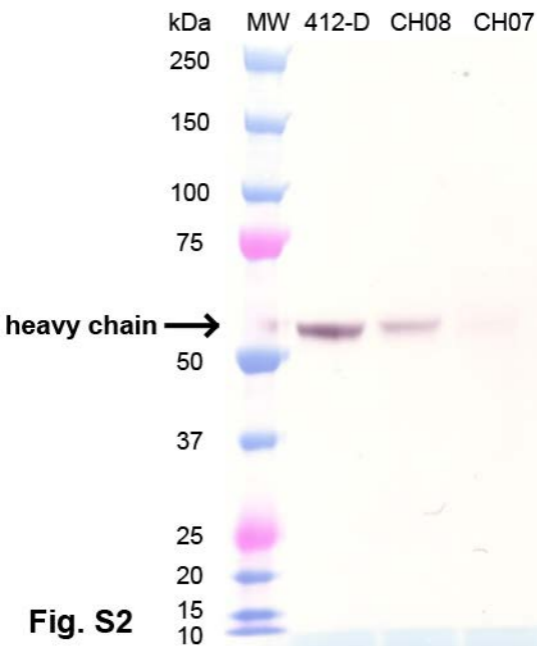

**Fig. S2**
